# Supplementary material
Source: PubMed Central journal article supplement (PMC7518135)
Supplement: Tapaskar_Appendix_Table_1_3.2020.pdf [file Tapaskar_Appendix_Table_1_3.2020.pdf]

**Appendix Table 1. Interventional Design and Timeline of the Order SMARTT Labs Initiative**

| <b>Date</b>             | <b>Process</b>                                                                                                                                                                                                                                                                                                                                                                                                                                                                                                                                                                                                                                                                                                                                                                                                        |
|-------------------------|-----------------------------------------------------------------------------------------------------------------------------------------------------------------------------------------------------------------------------------------------------------------------------------------------------------------------------------------------------------------------------------------------------------------------------------------------------------------------------------------------------------------------------------------------------------------------------------------------------------------------------------------------------------------------------------------------------------------------------------------------------------------------------------------------------------------------|
| May 2017                | A five-hundred-word proposal to reduce inpatient phlebotomy and improve inpatient sleep was submitted to an institutional Choosing Wisely Challenge. The proposal won the challenge, which was announced throughout the hospital and advertised on an institutional website. Winning the challenge gave this project institutional priority and access to a multidisciplinary team.                                                                                                                                                                                                                                                                                                                                                                                                                                   |
| July 2017-February 2018 | <p>A multidisciplinary team consisting of resident champions, hospitalists, lab services, nursing, and project managers collaborated to discuss an intervention to reduce phlebotomy that would be efficacious.</p> <p>The team designed a survey to assess lab ordering culture and preferences on adult general medicine services. The survey was partly modeled after a national survey assessing lab behavior.<sup>13</sup></p> <p>The survey responses revealed an institutional desire to reduce daily phlebotomy and favored a shift towards ordering labs every 48 hours.</p> <p>Survey responses were then utilized to design an educational curriculum that provided evidence-based recommendations for reducing phlebotomy as well as hospital level statistics about contemporary ordering practices.</p> |
| March 2018              | <p>The educational curriculum was provided to Internal Medicine residents and interns during a noon conference. Posters advertising the campaign were placed in resident work-rooms.</p> <p>The multidisciplinary team collaborated with informatics to design the two novel EHR tools.</p> <p>“Order Sleep” was launched hospital-wide for all lab orders. This tool allowed clinicians to type “Sleep Friendly” on any lab order to obtain 3 sleep-friendly options: 1) 10 PM 2) 6 AM and 3) 6 AM every 48 hours.</p>                                                                                                                                                                                                                                                                                               |
| April 2018              | The educational curriculum was provided to the Section of Hospital Medicine.                                                                                                                                                                                                                                                                                                                                                                                                                                                                                                                                                                                                                                                                                                                                          |
| May 2018                | The second novel EHR tool was launched. This was the “4 AM Labs” column on patient lists. It displayed a checkmark if 4 AM labs (non-sleep-friendly) were ordered for a patient.                                                                                                                                                                                                                                                                                                                                                                                                                                                                                                                                                                                                                                      |
| September 2018          | The educational curriculum was provided to the new class of Internal Medicine interns.                                                                                                                                                                                                                                                                                                                                                                                                                                                                                                                                                                                                                                                                                                                                |

Appendix Table 1. Timeline of the steps taken to implement the Order SMARTT Labs intervention.
