# Supplementary material
Source: PubMed Central journal article supplement (PMC7518135)
Supplement: Tapaskar_Appendix_Table_2_3.2020.pdf [file Tapaskar_Appendix_Table_2_3.2020.pdf]

**Appendix Table 2. Institutional and Prior Survey Results**

|                                                                                                        | Residents<br>(n=82) | Roman et al. <sup>13</sup> |                       |
|--------------------------------------------------------------------------------------------------------|---------------------|----------------------------|-----------------------|
|                                                                                                        |                     | Residents<br>n=139         | Hospitalists<br>n=197 |
| Year of training                                                                                       |                     |                            |                       |
| PGY1                                                                                                   | 26 (31.7)           | --                         | --                    |
| PGY2                                                                                                   | 25 (30.5)           | --                         | --                    |
| PGY3 +                                                                                                 | 31 (36.5)           | --                         | --                    |
| Hospitalized patients should have daily laboratory testing; n (% agree)                                | 17 (20.7)           | 63 (45.3)                  | 55 (27.9)             |
| Hospitalized patients should have laboratory testing on discharge day; n (% agree)                     | 17 (20.7)           | 52 (37.4)                  | 62 (31.5)             |
| I would be comfortable if my hospitalized patients received less daily laboratory testing; n (% agree) | 60 (73.1)           | 119 (85.6)                 | 166 (84.3)            |

Appendix Table 2. Comparison of our institutional survey results with a prior survey administered by Roman et al. The Roman et al. survey questions were utilized as a foundation for the institutional survey created. Survey results demonstrate our institutional culture is similar to prior trends, with the majority of residents favoring reduced daily labs.
