# Supplementary material
Source: PubMed Central journal article supplement (PMC7518135)
Supplement: Tapaskar_Appendix_Table_3_3.2020.pdf [file Tapaskar_Appendix_Table_3_3.2020.pdf]

**Appendix Table 3. Patient Characteristics and Total Lab Draws**

|                                                   | Resident General Medicine Services                               |                          |                         | Hospitalist General Medicine Services                             |                          |                         |
|---------------------------------------------------|------------------------------------------------------------------|--------------------------|-------------------------|-------------------------------------------------------------------|--------------------------|-------------------------|
|                                                   | Pre-Intervention                                                 | Post-Intervention        | p-value                 | Pre-Intervention                                                  | Post-Intervention        | p-value                 |
| <b>Total Patients</b>                             | 2183                                                             | 1929                     |                         | 1346                                                              | 1587                     |                         |
| <b>Total Patient Encounters</b>                   | 2636                                                             | 2266                     |                         | 1595                                                              | 1832                     |                         |
| <b>Length of Stay, Patient-days (Median, IQR)</b> | 15,804 (5, 2-8)                                                  | 11,862 (4,2-6)           | <0.05                   | 10,304 (5,3-8)                                                    | 12,981(5,3-8)            | <0.05                   |
| <b>Age, years (mean, SD)</b>                      | 56.26 (19.42)                                                    | 56.66 (19.82)            | 0.25                    | 56.43 (20.39)                                                     | 56.85 (19.80)            | 0.25                    |
| <b>Gender</b>                                     |                                                                  |                          | 0.62                    |                                                                   |                          | 0.43                    |
| <b>Female encounters (n, %)</b>                   | 1478 (56.07)                                                     | 1254 (55.34)             |                         | 938 (58.81)                                                       | 1052 (57.42)             |                         |
| <b>Male encounters (n, %)</b>                     | 1158 (43.93)                                                     | 1012 (44.66)             |                         | 657 (41.19)                                                       | 780 (42.58)              |                         |
|                                                   |                                                                  |                          |                         |                                                                   |                          |                         |
|                                                   | <b>Pre-Intervention</b>                                          | <b>Post-Intervention</b> | <b>95% CI (p-value)</b> | <b>Pre-Intervention</b>                                           | <b>Post-Intervention</b> | <b>95% CI (p-value)</b> |
| <b>Total Routine Lab Draws/Patient-Day/Week</b>   | 4.67                                                             | 3.36                     | 0.88-1.74 (<0.05)       | 4.73                                                              | 3.60                     | 0.61-1.64 (<0.05)       |
|                                                   |                                                                  |                          |                         |                                                                   |                          |                         |
|                                                   | <b>Pre-Intervention (Both Resident and Hospitalist Services)</b> |                          |                         | <b>Post-Intervention (Both Resident and Hospitalist Services)</b> |                          | <b>95% CI (p-value)</b> |
| <b>Total Routine Lab Draws/Patient-Day/Week</b>   | 4.68                                                             |                          |                         | 3.45                                                              |                          | 0.82-1.63 (<0.05)       |
| <b>Sleep-Friendly Lab Draws/Patient-Day (%)</b>   | 6                                                                |                          |                         | 21                                                                |                          | <0.001                  |

Appendix Table 3. Patient characteristics are reported for all patients admitted to the resident and hospitalist general medicine services in the pre and post-intervention time periods. We see no significant differences in patient encounters, length of stay, and demographics in the pre-and post-time periods. Significant changes in total and sleep-friendly lab draws per patient-day/week are also shown. There is a significant increase in the proportion of sleep friendly lab draws/patient-day on resident and hospitalist services.
