# Supplementary material
Source: PubMed Central journal article supplement (PMC7518135)
Supplement: Tapaskar_Appendix_Table_4_3.2020.pdf [file Tapaskar_Appendix_Table_4_3.2020.pdf]

**Appendix Table 4. Institutional Cost Savings**

| Lab Test                                                        | Direct Variable Labor & Benefits Cost |                 | Direct Variable Supplies Cost              |                  |
|-----------------------------------------------------------------|---------------------------------------|-----------------|--------------------------------------------|------------------|
| Complete blood count (CBC)                                      | \$7.42                                |                 | \$0.28                                     |                  |
| Basic metabolic panel (BMP)                                     | \$3.99                                |                 | \$4.02                                     |                  |
| CBC                                                             | Total patient days                    | Total lab draws | Ratio (total lab draws/total patient days) | Cost             |
| Pre-intervention observed (a)                                   | 26,108                                | 13,797          | 0.5285                                     | \$106,236        |
| Post-intervention observed (b)                                  | 24,843                                | 9,842           | 0.3962                                     | \$75,782         |
| <i>Post-period expected (if no intervention took place) (c)</i> | <i>24,843</i>                         | <i>13,128</i>   | <i>0.5285</i>                              | <i>\$101,088</i> |
| <b>*Actual cost savings observed (b-a)</b>                      |                                       |                 |                                            | \$30,454         |
| <b>**Estimated cost savings (c-b)</b>                           |                                       |                 |                                            | \$25,306         |
| BMP                                                             | Total patient days                    | Total lab draws | Ratio (total lab draws/total patient days) | Cost             |
| Pre-intervention observed (x)                                   | 26,108                                | 13,040          | 0.4995                                     | \$104,487        |
| Post-intervention observed (y)                                  | 24,843                                | 9,318           | 0.3751                                     | \$74,663         |
| <i>Post-period expected (if no intervention took place) (z)</i> | <i>24,843</i>                         | <i>12,408</i>   | <i>0.4995</i>                              | <i>\$99,424</i>  |
| <b>^Actual cost savings observed (x-y)</b>                      |                                       |                 |                                            | \$29,824         |
| <b>^^ Estimated cost savings (z-y)</b>                          |                                       |                 |                                            | \$24,761         |

\*Cost savings are the difference between a and b

\*\*Estimated cost savings (based on pre-intervention ratio) is the difference between c and b

^Cost savings are the difference between x and y

^^ Estimated cost savings (based on pre-intervention ratio) is the difference between y and z

**Appendix Table 4.** Institutional costs and savings are shown. The pre-intervention time period is defined as 7/1/2017-2/28/2018 and the post-intervention time period is 3/1/2018-11/2/2018. The table reports two different cost-savings for CBC and BMP. The ratio of total lab draws/patient day is utilized to correct for the difference in patient days in the post-intervention period compared to pre-intervention. The “post-period expected (if no intervention took place)” depicts the number of CBCs and BMPs that would have been drawn in the post-intervention time period had we not launched our intervention (thereby making the ratio of total lab draws to total patient days equivalent in the pre and post-intervention time periods). We see that our institution saved money both because of the fewer number of patient days in the post-intervention time period (which is not directly linked to our intervention) as well as because of fewer lab draws post-intervention (which is linked to our intervention).
